# Supplementary material for: Naringin Exhibited Therapeutic Effects against DSS-Induced Mice Ulcerative Colitis in Intestinal Barrier–Dependent Manner
Source: MDPI journal article supplement (doi:10.3390/molecules26216604), 2021-10-31
Supplement: s1 [file s1]

## **Supporting Information**

### **Naringin exhibited therapeutic effects against DSS-induced mice ulcerative colitis in intestinal barrier–dependent manner**

Ruige Cao <sup>1,†</sup>, Xing Wu <sup>1,†</sup>, Hui Guo <sup>1</sup>, Xin Pan <sup>1</sup>, Rong Huang <sup>1,\*</sup>, Gangqiang Wang  
<sup>1,2,\*</sup> and Jikai Liu <sup>1,\*</sup>

1 School of Pharmaceutical Sciences, South-Central University for Nationalities,  
Wuhan 430074, China;

2 Hubei Key Laboratory of Radiation Chemistry and Functional Materials, Non-  
power Nuclear Technology Collaborative Innovation Center, Hubei University of  
Science and Technology, Xianning 437100, China;

\*Corresponding author:

E-mail: ronghuang@mail.scuec.edu.cn (R.H.)

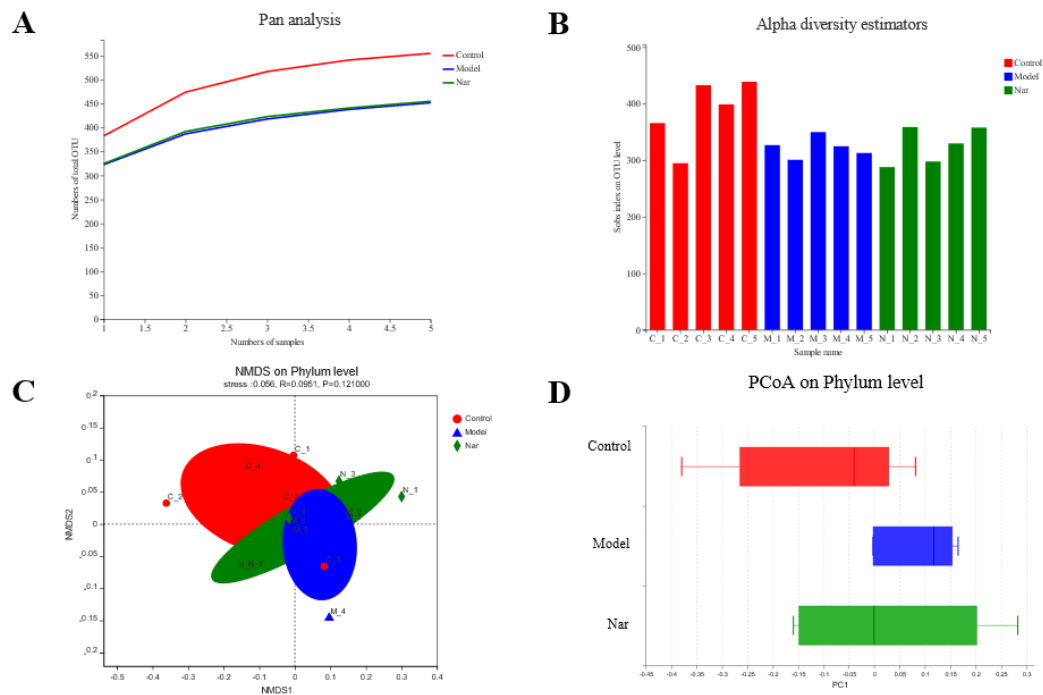

Figure S1. Naringin regulates the composition of intestinal flora in mice. (A) Pan/Core species analysis, (B) Alpha diversity analysis, (C) NMDS analysis, (D) PCoA analysis (n = 5).

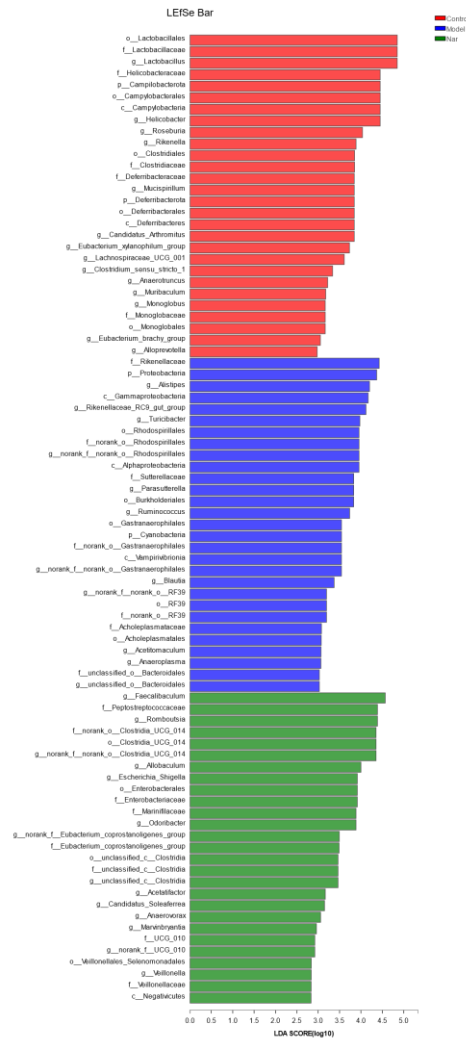

Figure S2. LDA analyses based on OTUs characterized the microbiomes of the control group, model group and Nar group. LDA scores show the significant bacterial differences between three groups (n = 5).
